# Supplementary material for: An essential role for the nuclear protein Akirin2 in mouse limb interdigital tissue regression
Source: PubMed Central journal article supplement (PMC6095873; doi:10.1038/s41598-018-30801-2), 2018-08-16
Supplement: 41598_2018_30801_MOESM1_ESM.pdf [file 41598_2018_30801_MOESM1_ESM.pdf]

**An essential role for the nuclear protein Akirin2 in  
mouse limb interdigital tissue regression**

**Peter J. Bosch, Leah C. Fuller & Joshua A. Weiner\***

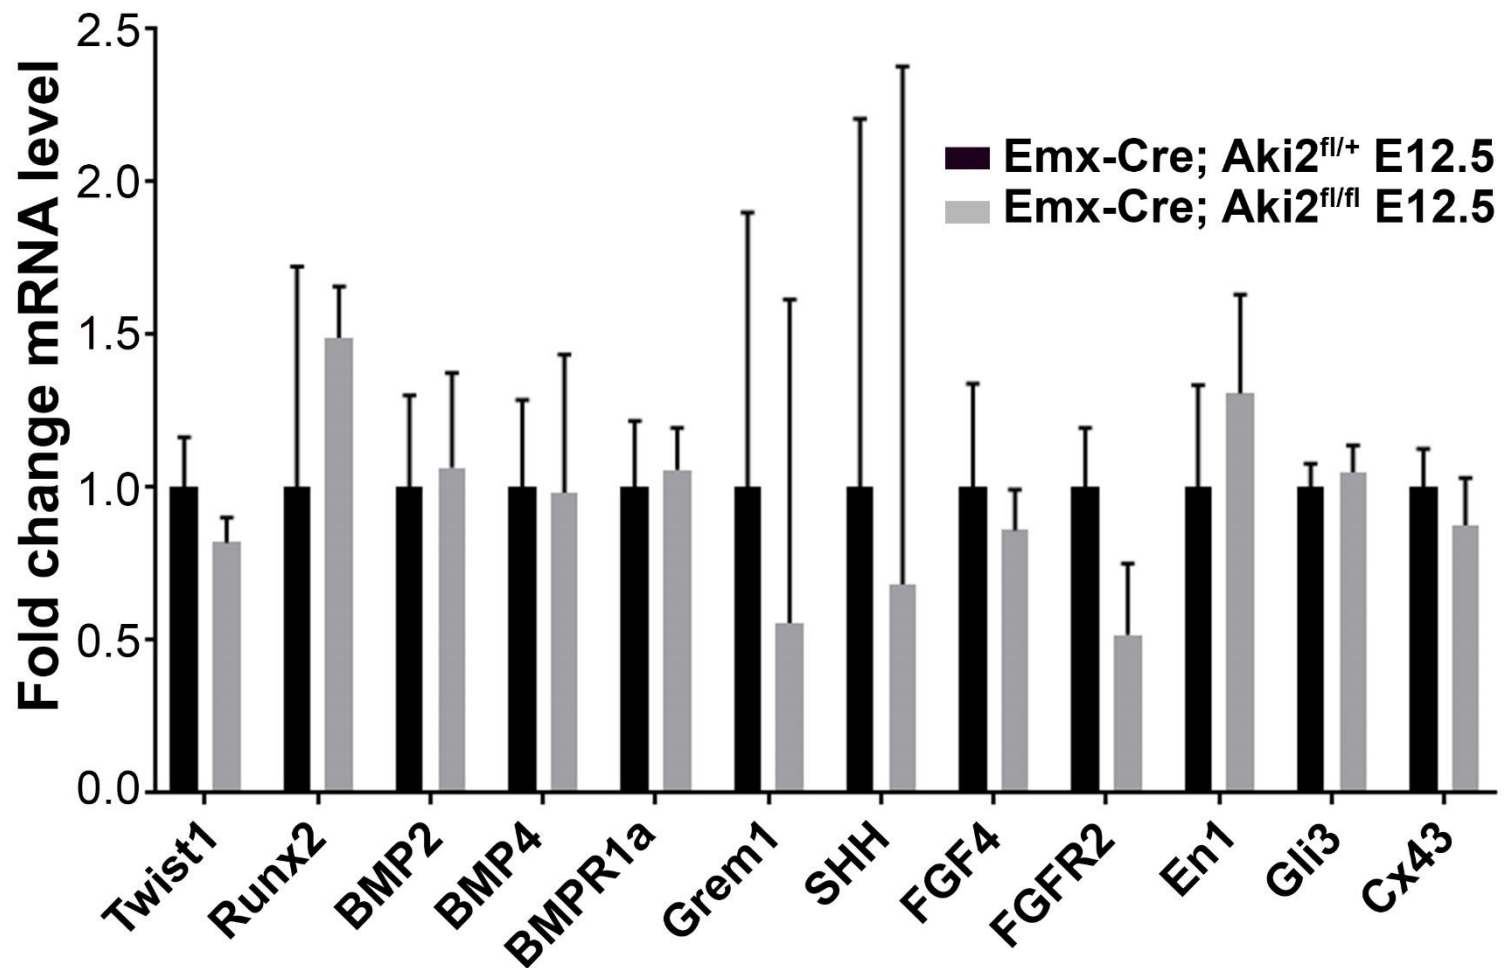

**Supplementary Fig S1:** Loss of Akirin2 in the limb epithelium does not significantly alter the overall expression levels of several syndactyly-associated genes. Control and Aki2 Emx-KO embryos were collected at E12.5 and forelimbs dissected and assessed for mRNA expression differences using quantitative real-time PCR (qPCR). All samples were normalised to  $\beta$ -actin levels. n = 6-9 Con; n = 5-7 Aki2 KO, run in triplicate wells.
